# Supplementary material
Source: publisher site journal article supplement (https://www.dovepress.com/article/309115)
Supplement: Supplementary file 1 [file get_supplementary_file.php]

**Supplemental Material Table S1 Correlation analysis between preoperative CTECs and pathological characteristics**

|  | **CTECs** | | **CD44+CTECs** | | **Vimentin+ CTECs** | | **CTEMs** | |
| --- | --- | --- | --- | --- | --- | --- | --- | --- |
| **Pathological characteristics** | ***r* value** | ***P* value** | ***r* value** | ***P* value** | ***r* value** | ***P* value** | ***r* value** | ***P* value** |
| Tumor position (body and tail) | 0.238 | **0.043** | 0.227 | 0.053 | 0.117 | 0.185 | 0.145 | 0.222 |
| Tumor size | 0.146 | 0.217 | 0.107 | 0.367 | 0.084 | 0.479 | 0.242 | **0.039** |
| Differentiation (poor) | 0.005 | 0.965 | 0.165 | 0.163 | 0.014 | 0.908 | -0.073 | 0.541 |
| Margin status (R0) | 0.096 | 0.417 | 0.208 | 0.077 | 0.020 | 0.869 | 0.208 | 0.077 |
| Vascular infiltration | 0.043 | 0.719 | 0.072 | 0.544 | 0.259 | **0.027** | 0.154 | 0.192 |
| Perineural infiltration | 0.037 | 0.755 | 0.014 | 0.904 | -0.011 | 0.925 | -0.058 | 0.623 |
| Carcinoma embolus | -0.123 | 0.299 | -0.107 | 0.368 | -0.096 | 0.418 | -0.087 | 0.623 |
| Positive lymph nodes (numbers) | 0.023 | 0.846 | 0.416 | 0.097 | -0.064 | 0.591 | -0.027 | 0.822 |
| Bold value: P < 0.05, considered statistically significant | | | | | | | | |


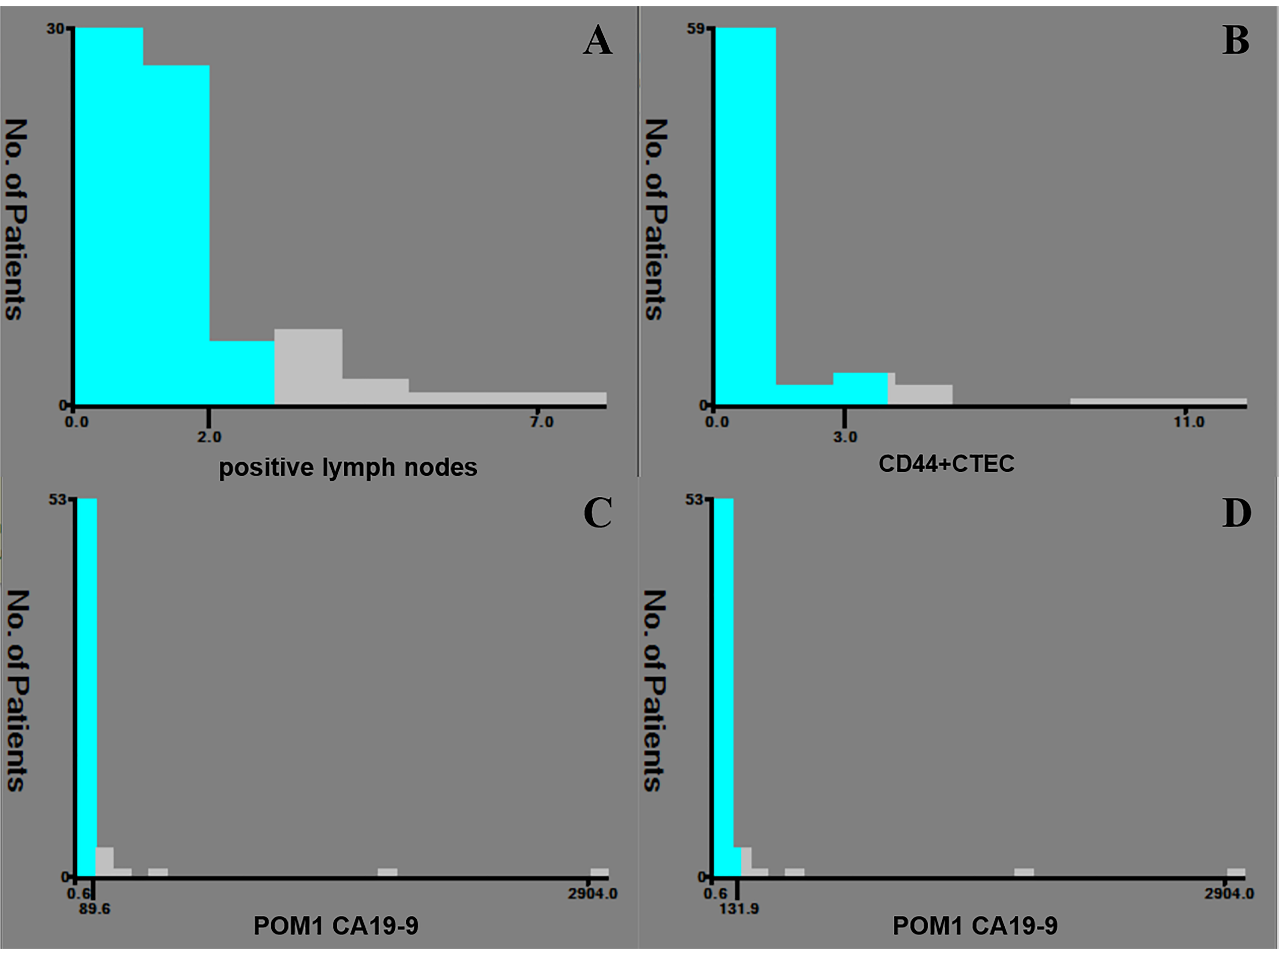


Supplemental Material Figure S1. Optimal cutoff values of (A) positive lymph nodes for DFS, (B) preoperative CD44+ CTECsfor DFS**,** (C) POM1 CA19-9 for DFS, (D) POM1 CA19-9 for OS determined by the Xtile software.
